# Supplementary material for: Robust in situ exsolved nanocatalysts on perovskite oxide as an efficient anode for hydrocarbon fueled solid oxide fuel cells
Source: Royal Society of Chemistry journal article supplement (doi:10.1039/d1se01992a), 2022-01-01
Supplement: d1se01992a1.pdf [file d1se01992a1.pdf]

## Supplementary Information

### **Robust *in-situ* exsolved nanocatalysts on perovskite oxide as an efficient anode for hydrocarbon fueled solid oxide fuel cells**

Yaojie Zhu,<sup>a</sup> Tong Liu,<sup>b\*</sup> Yao Wang,<sup>b</sup> Xiaoyu Zhang,<sup>b</sup> Cong Ren,<sup>c</sup> Wenlu Li<sup>a\*</sup> and Shimin Wang<sup>a\*</sup>

a. Key Laboratory for the Green Preparation and Application of Functional Materials, Hubei Collaborative Innovation Center for Advanced Organic Chemical Materials & Ministry of Education, Hubei Key Laboratory of Polymer Materials, Hubei University, Wuhan 430062, China. School of Materials Science and Engineering, Hubei University, 368 Youyi Avenue, Wuhan, Hubei Province, 430062, China

\* liwenlu2011@126.com (W. L.) and shiminwang@126.com (S. W.)

b. Key Laboratory of Hydraulic Machinery Transients (Wuhan University), Ministry of Education, School of Power and Mechanical Engineering, Wuhan University, Wuhan, Hubei 430072, China

\* liu\_tong@whu.edu.cn

c. Department of Applied Chemistry, School of Advanced Materials and Nanotechnology, Xidian University, Xi'an 710071, China

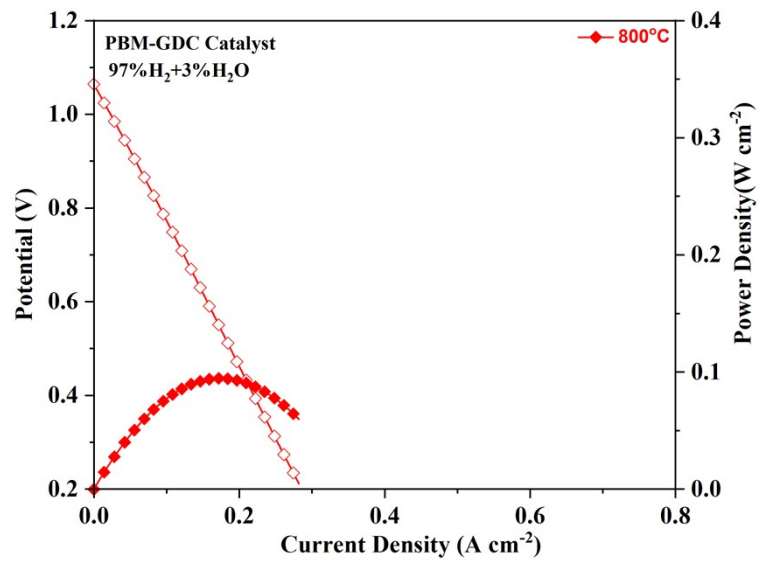

Figure S1 Typical  $i$ - $V$  and  $i$ - $p$  curves for the single cell with LPBM-GDC anode when exposing the anode and cathode to 3% H<sub>2</sub>O humidified and ambient air, respectively

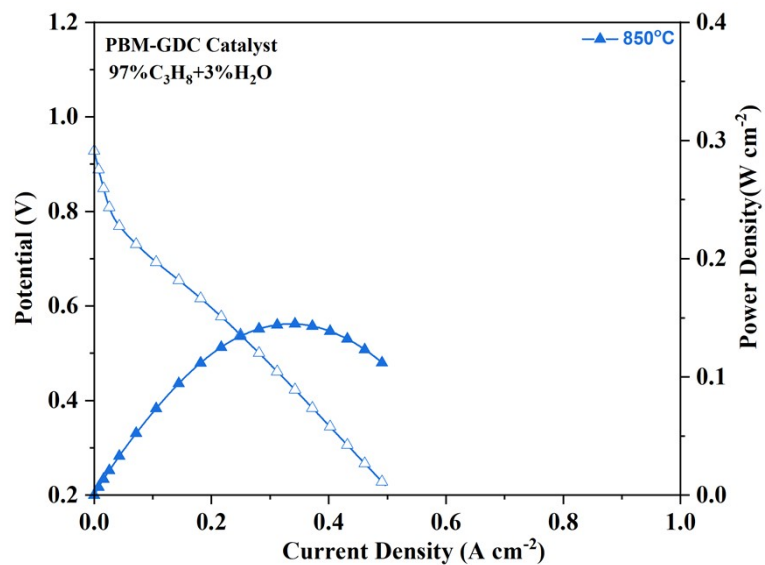

Figure S2 Typical  $i$ - $V$  and  $i$ - $p$  curves for the single cell with LPBM-GDC anode when exposing the anode and cathode to 3% H<sub>2</sub>O humidified propane and ambient air, respectively
